# Supplementary material for: Effects of the Iliopsoas Strain–Counterstrain Technique on Mechanical Chronic Low Back Pain: A Randomized Controlled Trial
Source: Research Square preprint supplement (doi:10.21203/rs.3.rs-7648408/v1), 2025-11-07
Supplement: Supplementary file 1 [file 346e7f66fb9dfd4be47626e9.xlsx]

## Sheet: Table 2
Table 2. Distribution of different outcomes according to two arms in addition to related effect sizes.
Clinical Outcome	SCS group			Control group			Beta coefficient [95% CI]	Between group analysis	MD [95% CI]	SMD [95% CI]
	Baseline (N=18)	After First session (N=18)	After Sixth session (N=15)	Baseline (N=18)	After First session (N=18)	After Sixth session (N=14)
VAS at rest	6.39 ± 1.48	3.20 ± 1.51	2.12 ± 1.01	5.99 ± 1.77	5 ± 1.95	3.82 ± 1.76	5.99 [5.18, 6.79]	After session 1	-1.8 [-2.98, -0.62]*	-1.03 [-1.72, -0.33]*
								After session 6	-1.87 [-3.2, -0.54]*	-0.65 [-1.12, -0.19]*
VAS During Flexion	6.19 ± 1.57	2.09 ± 1.2	0.66 ± 0.91	6.09 ± 2.39	4.76 ± 2.43	3.68 ± 2.17	6.09 [5.10, 7.08]	After session 1	-2.67 [-3.97, -1.37]*	-1.39 [-2.12, -0.65]*
								After session 6	-3.32 [-5.17, -1.46]*	-0.83 [-1.29, -0.37]*
MMST	6 ± 1.64	6.83 ± 1.31	7.35 ± 1.47	5.80 ± 1.26	5.82 ± 1.07	5.78 ± 1.27	5.8 [5.14, 6.46]	After session 1	1.02 [0.21, 1.82]*	0.84 [0.15, 1.52]*
								After session 6	1.33 [0.21, 2.44]*	0.55 [0.09, 1.01]*
Lumbar Flexion	43.11 ± 14.31	49.78 ± 13.03	49.44 ± 12.34	37.08 ± 13.83	37.17 ± 13.11	38.37 ± 12.81	37.08[0.86, 43.3]	After session 1	12.61 [3.76, 21.46]*	0.96 [0.27, 1.65]*
								After session 6	14.78 [5.35, 24.25]*	0.72 [0.26, 1.18]*
Lumbar Extension	14.68 ± 7.04	19.58 ± 8.93	22.89 ± 8.12	11.49 ± 5.89	12.98 ± 6.79	14.36 ± 7.28	11.49 [7.98, 15.01]	After session 1	6.59 [1.22, 11.97]*	0.83 [0.14, 1.51]*
								After session 6	8.17 [2.57, 13.77]*	0.67 [0.21, 1.13]*
Thomas Test Right	7.94 ± 3.39	4.83 ± 2.66	3.27 ± 1.62	6.11 ± 3.01	5.83 ± 3.15	6.14 ± 3.35	6.11 [4.72, 7.5]	After session 1	-1 [-2.97, 0.97]	-0.34 [-1, 0.32]
								After session 6	-3.68 [-5.90, -1.46]*	-0.77 [−1.23,−0.31]*
Thomas Test Left	6.22 ± 2.39	4.05 ± 1.92	2.53 ± 1.96	6.44 ± 4.19	6 ± 3.92	5.71 ± 3.87	6.44 [4.94, 7.95]	After session 1	-1.94 [-4.04, 0.15]	-0.63 [-1.3, 0.04]
								After session 6	-3.39 [-5.67, -1.01]*	-0.66 [−1.12,−0.20]*
ODI	36.54 ± 10.23	19.68 ± 10.81	12 ± 7.12	37.78 ± 12.15	36.17 ± 12.86	26.82 ± 12.85	37.78 [32.21, 43.34]	After session 1	-16.49 [-24.53, -8.44]*	-1.38 [-2.11, -0.65]*
								After session 6	-17.87 [-26.99, -8.75]*	-0.9 [-1.36, -0.44]*
SCS: iliopsoas strain-counterstrain technique; VAS: visual analogue pain scale; MMST: Modified-Modified Schober Test; ODI: Oswestry Disability Index; MD: Mean difference; CI: Confidence interval; SMD: Standardized mean difference (based on Cohen’s d test).
* Statically significant difference between groups based on Bonferroni post-hoc test.

## Sheet: Table 3
Table 3. Result of domains of SF-36 questionnaire according to two arms in addition to related effect sizes.
Clinical Outcome	SCS group			Control group			Beta coefficient [95% CI]	Between group analysis	MD [95% CI]	SMD [95% CI]
	Baseline (N=18)	After First session (N=18)	After Sixth session (N=15)	Baseline (N=18)	After First session (N=18)	After Sixth session (N=14)
Physical Functioning	62.22 ± 21.37	83.89 ± 14.2	88 ± 10.14	66.67 ± 16.36	66.94 ± 16.81	77.14 ± 16.26	66.67 [58.84, 74.49]	After session 1	16.94 [6.4, 27.49]*	1.089 [0.38, 1.78]*
								After session 6	11.91 [0.04, 23.77]*	0.46 [0.01, 0.92]*
Physical Health	26.39 ± 31.47	79.17 ± 34.57	88.33 ± 28.14	27.78 ± 34.18	34.72 ± 38.48	51.78 ± 45.43	27.78 [8.14, 47.41]	After session 1	44.44 [19.67, 69.22]*	1.21 [0.49, 1.92]*
								After session 6	34.59 [0.66, 68.53]*	0.47 [0.01, 0.93]*
Emotional Problems	35.18 ± 38.73	88.89 ± 19.78	91.11 ± 26.62	31.48 ± 35.19	48.15 ± 39.98	69.04 ± 40.23	31.48 [14.19 ± 48.77]	After session 1	40.75 [19.38, 62.11]*	1.29 [0.56, 2]*
								After session 6	21.87 [-8.21, 51.96]	0.34 [-0.13, 0.8]
Energy	41.11 ± 18.19	62.22 ± 17.25	69.67 ± 16.95	46.11 ± 17.28	46.94 ± 17.58	57.86 ± 16.72	46.11 [37.17, 55.05]	After session 1	15.28 [3.48, 27.08]*	0.88 [0.18, 1.56]*
								After session 6	11.02 [-4.65, 26.71]	0.33 [-0.14, 0.8]
Emotional Well- Being	60.89 ± 15.91	72.72 ± 15.09	76 ± 15.34	60 ± 14.39	64.44 ± 12.57	73.78 ± 13.23	60 [52.68, 67.31]	After session 1	8.28 [-1.13, 17.68]	0.6 [-0.08, 1.26]
								After session 6	0.64 [-11.91, 13.20]	0.02 [-0.37, 0.41]
Social Functioning	63.19 ± 17.92	75 ± 15.46	79.17 ± 14.69	61.11 ± 22.23	64.58 ± 18.32	69.64 ± 13.62	61.11 [52.75, 69.47]	After session 1	10.42 [-1.06, 21.9]	0.61 [-0.06, 1.28]
								After session 6	11.94 [-0.74, 24.62]	0.43 [-0.02, 0.88]
Pain	35.97 ± 17.17	70 ± 13.8	76.33 ± 14.29	40.28 ± 17.84	48.05 ± 17.29	56.61 ± 20.06	40.28 [31.31, 49.25]	After session 1	21.94 [11.35, 32.54]*	0.4 [0.66, 2.13]*
								After session 6	22.33 [7.87, 36.79]*	0.71 [0.26, 1.16]*
General Health	57.5 ± 16.74	64.17 ± 17.92	64.67 ± 18.85	56.67 ± 16.45	55.83 ± 15.83	53.57 ± 14.33	56.67 [46.73, 66.6]	After session 1	8.33 [-3.12, 19.79]	0.49 [-0.17, 1.15]
								After session 6	16.18 [-4.34, 36.70]	0.36 [-0.09, 0.81]
Physical Component Summary	47.70± 1.03	49.57 ± 0.84	49.92 ± 0.55	47.97 ± 0.91	48.14 ± 1.02	48.58 ± 1.31	47.97 [47.42, 48.52]	After session 1	1.43 [0.78, 2.07]*	1.53 [0.77, 2.27]*
								After session 6	1.39 [0.52, 2.26]*	0.74 [0.28, 1.20]*
Mental Component Summary	48.46 ± 1.44	49.78 ± 1.25	50.12 ± 1.37	48.38 ± 1.42	48.84 ± 1.35	49.70 ± 1.22	48.38 [47.71, 49.06]	After session 1	0.93 [0.05, 1.82]*	0.72 [0.04, 1.39]*
								After session 6	0.33 [-0.81, 1.47]	0.13 [-0.32, 0.58]
MD: Mean difference; CI: Confidence interval; SMD: Standardized mean difference (based on Cohen’s d test).
* Statically significant difference between groups based on Bonferroni post-hoc test.
