# Supplementary material for: Effects of the Iliopsoas Strain–Counterstrain Technique on Mechanical Chronic Low Back Pain: A Randomized Controlled Trial
Source: Research Square preprint supplement (doi:10.21203/rs.3.rs-7648408/v1), 2025-11-07
Supplement: Supplementary file 3 [file 5590cd1404541173486d0cd8.xlsx]

## Sheet: Sheet1
set	MD	SE	var
1	1.7405	0.234972	0.055212
2	1.62203	0.228558	0.0522387
3	1.53808	0.242131	0.0586273
4	1.70966	0.231362	0.0535283
5	1.63757	0.256936	0.0660161
6	1.52039	0.233589	0.0545636
7	1.69421	0.235768	0.0555867
8	1.33072	0.258015	0.0665717
9	2.01853	0.244538	0.0597986
10	1.64974	0.227651	0.0518251
Pooled MD	1.64614		0.0573968
Var(B)	0.0312865		Var(w)
Var(T)	0.091812	SE(pooled)	0.303005
	Point estimate ES	1.64614
	Lower Limit ES	1.05225
	Upper Limit ES	2.24003
