# Supplementary material for: Effects of the Iliopsoas Strain–Counterstrain Technique on Mechanical Chronic Low Back Pain: A Randomized Controlled Trial
Source: Research Square preprint supplement (doi:10.21203/rs.3.rs-7648408/v1), 2025-11-07
Supplement: Supplementary file 5 [file aa58d8f8c9bb62c23325c388.xlsx]

## Sheet: Sheet1
ID	GROUP	AGE	SEX	Height	Weight	BMI	Dominant Side	Smoking	Occupation	Education Level	Duration	VAS B	VAS 1	VAS 6	VASF B	VASF1	VASF6	MMSTB	MMST1	MMST6	TMFB	TMF1	TMF6	TMEB	TME1	TME6	TT R B	TT R1	TT R6	TT LB	TT L1	TT L6	ODIB	ODI1	ODI6	SF-36 PF B	SF-36 PF 1	SF-36 PF 6	SF-36 RPH B	SF-36 RPH 1	SF-36 RPH 6	SF-36 REP B	SF-36 REP 1	SF-36 REP 6	SF-36 ENERGY B	SF-36 ENERGY 1	SF-36 ENERGY 6	SF-36 EW B	SF-36 EW 1
1	B	57	female	158	73	29.24	right	yes	Housewife	Primary School	4	7.9	5.7	5.9	3.1	1	1	5	5	5	28	27	24	2.4	8	11	4	3	2	3	2	2	48.89	42.22	33.33	55	70	90	0	0	25	0	0	0	25	25	55	48	48
2	B	50	male	176	60	21.51	right	yes	Retired	Illiterate	3	7.3	7.3	4.8	8.9	8.9	4.9	2	3	3.5	5	7	14	7.7	9	10	8	8	4	5	5	5	28.89	28.89	22.22	60	60	60	25	25	50	33.3	33.3	100	30	30	50	56	56
3	A	45	female	163	75	28.23	right	no	Employed	University	18	7.5	4.5	2	5.9	3.4	0	7	8	8.5	47.5	48	52	1.2	2.2	18	8	5	4	10	6	2	48.89	37.78	13.33	50	60	85	0	0	100	33.3	33.3	100	50	50	80	84	84
4	A	60	female	161	70	27.01	right	yes	Employed	High School	4	4.7	3.5	2.5	7	2	0	1	3	5	22	40	45	9	9.5	13	4	2	0	3	3	0	40	11.11	2.22	35	80	90	0	75	100	0	100	100	35	60	75	68	92
5	A	42	female	156	84	34.52	right	no	Employed	University	3	7.2	3	3	6	3	2.8	6	8	10	45	63	60	10	19	22	12	8	3	6	5	5	40	31.11	15.56	35	80	75	0	50	0	0	66.7	0	20	55	40	44	60
6	A*	39	female	167	68	24.38	right	no	Employed	University	36	8.7	3.6		7	1		5	6		49	56		13	16		3	0		2	2		51.11	6.67		55	100		0	100		0	100		60	100		68	100
7	B	45	male	165	67.5	24.79	left	no	Retired	University	3	3.1	3	3	8	5	5.5	5	5	4	48	48	30	13.5	13	12	3	2	2	2	2	3	28.89	28.89	22.22	90	90	90	100	100	100	100	100	100	70	70	55	84	84
8	B	22	male	171	70	23.94	right	no	Employed	University	3	3.5	1.3	1.1	5.1	3	2.8	7	7	7	54	53	60	23	31	33	5	3	5	8	5	6	13.33	11.11	11.11	95	95	95	75	100	100	100	100	66.7	60	55	70	60	60
9	A*	33	male	176	80	25.83	right	yes	Employed	University	36	4.1	1.4		4	2		6	7		65	67		21	25		4	3		3	2		33.33	33.33		95	95		0	0		100	100		50	50		52	52
10	B	50	female	165	69	25.34	right	no	Employed	High School	20	7.1	7.1	5.4	7.7	7.7	5.4	7	7	6	57	51	50	20	22	22	6	6	8	5	4	3	53.33	57.78	55.56	50	50	55	0	0	0	0	0	33.33	40	35	45	36	36
11	A	27	female	165	67	24.61	right	no	Employed	University	24	4.6	0.7	0.6	3.7	0.3	0.6	7	7	8	72	81	83	18	24	21	4	3	3	9	8	4	24.44	8.89	8.89	85	95	95	75	100	100	100	100	100	50	80	80	56	80
12	B*	42	female	170	79	27.34	right	yes	Employed	Middle School	3	7.4	6.1		8.3	5.4		6	6		24	24		6	8		6	5		6	6		48.89	48.89		65	75		0	0		33.33	33.33		35	55		52	60
13	B	50	female	162	65	24.77	right	yes	Retired	University	3	3.7	5.3	2.3	3.7	3.7	1.4	7	7	8	55	56	54	15	16	25	3	3	5	4	3	4	35.55	28.89	20	50	50	80	0	0	0	0	33.3	33.3	45	55	75	60	64
14	B	25	female	158	53	21.23	right	yes	Employed	University	48	3.1	3.2	4	3	2.7	5.2	4.5	4.5	6	35	37	38	8	9	12	4	4	6	6	6	3	15.56	15.56	13.33	65	65	90	75	75	100	66.7	66.7	100	35	35	55	48	48
15	A	34	female	158	56	22.43	right	yes	Employed	University	5	3.3	0.3	0	5.8	0.5	0	8	8.5	8	53	57	55	25	37	37	10	9	5	9	8	5	24.44	18.78	4.44	75	85	100	75	100	100	0	66.7	100	30	60	90	52	64
16	A*	31	male	178	80	25.25	right	yes	Employed	University	12	6.1	1.7		5.6	1.5		7	7.5		52	58		16	25		5	3		6	4		20	20		80	85		50	100		66.7	100		35	70		72	69
17	B	49	male	186	95	27.46	right	no	Employed	Postgraduate	8	7	5.5	3.2	8.2	4.2	3.1	6.5	6.7	4	32	30	25	5	5.5	9	8	8	5	5	5	5	31.11	26.67	22.22	90	90	95	75	75	100	66.7	100	100	40	40	80	64	64
18	A	29	male	181	77	23.5	right	no	Employed	University	3	6.6	1.8	1.7	8	1.1	0	6	7	8	51	54	53	8	10	20	8	5	1	5	4	0	20	8.89	6.67	95	95	100	50	100	100	33.3	100	100	90	100	100	72	96
19	B	38	female	168	60	21.26	right	no	Employed	University	8	5.2	4	3.8	4.1	2.6	1.8	7	7	7	43	43	49	5	8	7	5	5	5	4	4	4	44.44	33.33	15.56	80	85	80	0	50	75	33.3	66.7	100	10	10	40	32	68
20	A	35	female	162	60	22.86	right	yes	Employed	University	8	6.1	5.1	2.3	3	2	1.3	6.5	7	7	44	49	55	19	25	26	12	5	4	4	3	3	24.44	13.33	13.33	75	80	80	50	50	50	66.7	66.7	66.7	55	60	70	80	72
21	B	49	male	172	88	29.75	left	no	Employed	University	3	8	7.1	2.6	6.3	5.6	1.3	6	6	6	49	48	47	15	16.2	15	12	11	12	20	18	15	31.11	31.11	20	70	70	85	0	0	0	33.3	33.3	33.3	55	55	65	56	64
22	A	32	female	160	58	22.66	right	no	Employed	University	6	8.7	5.1	1.6	5.3	1.9	0	8	8	9	50	53	54	16	21	30	11	5	4	7	1	0	51.11	37.78	22.22	50	50	80	50	50	75	66.7	66.7	100	60	60	65	80	80
23	B*	21	female	167	59	21.16	right	no	Student	University	3	5.7	2.8		3.3	1.6		6	6		51	51		16	19.3		3	3		3	3		48.89	55.56		70	50		25	25		0	0		65	55		68	64
24	A	18	male	178	70	22.09	right	no	Student	High School	3	6.3	2.6	1.5	7.3	1.9	0	6.5	7	6.5	40	44	42	21	30	35	2	0	1	4	2	1	35.56	8.89	4.44	60	95	95	0	100	100	0	100	100	35	70	70	76	84
25	A	43	male	178	68	21.46	right	no	Employed	Middle School	7	5.9	4.2	2.2	7.9	5.5	0	8	8	8.8	43	44	46.1	18	19	18.5	11	9	2	8	4	0	37.78	13.33	11.11	70	95	95	0	100	100	0	100	100	35	50	60	52	72
26	A	32	male	175	67	21.88	right	yes	Employed	University	4	7	4.4	2.4	8	2.5	0.8	5	6	5	19	29	33.1	20.6	24	26.2	10	7	5	7	3	4	44.44	22.22	8.89	80	95	95	0	100	100	33.3	100	100	40	55	80	68	68
27	B	28	female	170	61	21.11	right	yes	Housewife	University	3	4.8	2.3	2.1	3.2	2	1.8	5	5	6	40	41	41	11	10	13	2	2	2	4	4	3	40	40	26.67	75	75	75	0	0	0	0	100	100	35	35	35	72	72
28	B	49	male	180	86	26.54	right	no	Employed	Postgraduate	24	7.1	5.4	5.2	8.8	7	6.2	6	6	6.5	26	26	33	11.5	7	10	10	10	10	6	6	5	55.56	51.11	35.56	70	70	75	50	75	75	33.3	66.7	100	75	75	75	60	68
29	B	41	male	178	94	29.67	right	no	Employed	High School	3	7.4	7.4	7.5	7.5	6.6	8	7	6	6	36	39	37.2	10	10	10	8	9	9	10	10	10	46.67	46.67	48.89	40	40	40	0	0	0	0	0	0	35	30	30	60	68
30	B*	24	male	186	106	30.64	right	yes	Employed	University	4	7.1	4.3		7	5.8		6.5	6.5		26.5	28		7	8		5	5		7	7		33.33	31.11		80	75		50	75		66.7	100		60	65		84	88
31	A	30	male	178	80	25.25	right	yes	Employed	Middle School	18	6.2	3.8	3.5	7.2	3.2	2.3	4.5	5	6	33.2	39	38	15	18	20.8	11	5	5	9	4	4	37.78	13.33	13.33	65	90	95	0	100	100	0	100	100	30	50	65	36	44
32	A	33	male	155	67	27.89	right	no	Housemen	High School	42	7.8	5.3	3.9	4.7	2.4	1.3	5.5	6	6	41.1	42	44.8	6.8	7.7	11	8	5	3	5	4	2	40	35.56	28.89	50	80	80	75	100	100	100	100	100	20	40	45	48	60
33	A	43	female	160	62	24.22	right	no	Employed	Postgraduate	3	7.3	3.4	1.8	8	1.6	0	5	7	7	25.2	43	48	2.6	11	12.3	11	6	5	7	5	5	46.67	13.33	8.89	20	90	90	0	100	100	0	100	100	30	70	80	60	72
34	A	24	female	161	80	30.86	right	yes	Employed	University	4	7	3.3	2.8	7	1.8	0.8	6	7	7.5	24	29	32.6	24	29	32.6	9	7	4	8	5	3	37.78	20	17.78	45	60	65	50	100	100	33.3	100	100	15	40	45	28	60
35	B	50	female	157	63	25.56	right	no	Employed	University	12	4.6	4.5	3.5	3.8	3.9	3.2	6	6	6	35	37	35	10	12	12	12	12	11	12	12	12	31.11	31.11	28.89	45	45	70	25	25	100	0	0	100	55	55	80	80	76
36	B*	59	female	163	75	28.23	right	yes	Employed	High School	6	7.8	7.8		9.7	9		5	5		23	23		20.8	21.7		6	6		6	6		44.44	42.22		50	50		0	0		0	33.3		60	65		60	72
[truncated: 16 more columns]
