# Supplementary material for: Effects of the Iliopsoas Strain–Counterstrain Technique on Mechanical Chronic Low Back Pain: A Randomized Controlled Trial
Source: Research Square preprint supplement (doi:10.21203/rs.3.rs-7648408/v1), 2025-11-07
Supplement: Supplementary file 6 [file eae34e52ae23814f6fed9975.docx]

Protocol Version: v1.0

Date: Feb 15, 2025

**1. TITLE PAGE**

**Effects of the Iliopsoas Strain–Counterstrain Technique on Mechanical Chronic Low Back Pain: Study protocol for a randomized controlled trial**

**Research Team:**

***Javad Hassanzadeh Bakhshkandi1, Mohammad Javaherian2, Osman Çoban3, Çiğdem Çınar 4, Onur Aydoğdu5, Günay Çimen Aysal6, Zübeyir Sari7**

1 Javad Hassanzadeh Bakhshkandi, Marmara University, Institute of Health Sciences, Department of Orthopedic Physiotherapy, Istanbul, Turkey ORCID: 0000-0001-5244-1631, E-Mail: [javadhassanzadeh.az@gmail.com](mailto:javadhassanzadeh.az@gmail.com)

2 Mohammad Javaherian, University of Social Welfare and Rehabilitation Sciences, Neuromusculoskeletal Rehabilitation Research Center, Tehran, Iran, E-Mail: [mohammadjavaherian1372@gmail.com](mailto:mohammadjavaherian1372@gmail.com)

3 Osman Çoban, Department of Physical Therapy and Rehabilitation, Faculty of Health Science, Istanbul Uskudar University, Istanbul, Turkey ORCID:0000-0003-4493-2478, E-Mail: [osman.coban@uskudar.edu.tr](mailto:osman.coban@uskudar.edu.tr)

4 Cigdem Cinar, Biruni University Hospital, Department of Physical Therapy and Rehabilitation, Istanbul, Turkey ORCID: 0000-0001-9159-6345 E-Mail: [ccinar@biruni.edu.tr](mailto:ccinar@biruni.edu.tr)

5 Onur Aydogdu, Marmara University Faculty of Health Sciences, Department of Physiotherapy and Rehabilitation, Istanbul, Turkey, ORCID: 0000-0001-6438-6713, E-Mail: onur.aydogdu@marmara.edu.tr

6 Gunay Cimen Aysal, Başkent University Istanbul Hospital, Department of Physical Therapy and Rehabilitation , Istanbul, Turkey, ORCID: 0009-0008-1458-7999, E-Mail: [gnycimen@gmail.com](mailto:gnycimen@gmail.com)

7 Zubeyir Sari, Marmara University Faculty of Health Sciences, Department of Physiotherapy and Rehabilitation, Istanbul, Turkey, ORCID: 0000-0003-1643-5415, E-Mail: [zsari@marmara.edu.tr](mailto:zsari@marmara.edu.tr)

***Corresponding author:** Javad Hassanzadeh Bakhshkandi, Marmara University, Institute of Health Sciences, Department of Orthopedic Physiotherapy, Istanbul, Turkey ORCID: 0000-0001-5244-1631, E-Mail: [javadhassanzadeh.az@gmail.com](mailto:javadhassanzadeh.az@gmail.com)

**2. ABSTRACT**

**Background:** Mechanical chronic low back pain (MCLBP) is a frequent clinical condition that can develop from spinal and intervertebral discs and surrounding soft tissue overuse or injuries. The limited lumbar flexion angle functions as a primary mechanical factor that leads to low back pain because tight iliopsoas muscles restrict lumbar movement. Research has investigated how strain‒counterstrain (SCS) technique applications at iliopsoas muscle tender points (TPs) reduce pain and improve lumbar mobility in patients with MCLBP.

**Methods:** This study is a randomized controlled trial involving 36 volunteers between the ages of 18–60 with MCLBP and tenderness at the iliopsoas muscle. They will be randomized into the control (receiving six sessions of lumbar therapeutic exercises alone) or experimental (receiving six sessions of the SCS technique at the iliopsoas muscle and therapeutic exercises) groups. The primary outcome will be pain intensity at rest and during flexion, as assessed via the visual analog scale (VAS). The secondary outcomes will lumbar flexion and extension range of motion (ROM); lumbar spinal mobility will be measured via the modified-modified Schober Test (MMST); iliopsoas muscle length will be measured via the Thomas test; the level of functional disability will be measured via the Oswestry Disability Index (ODI); and health-related quality of life (QOL) will be evaluated via the Short Form-36 (SF-36). Assessments will be conducted at three time points: pretest (prior to intervention), posttest (immediately after intervention), and after the sixth session.

**Discussion:** This trial may provide evidence for the efficacy of the iliopsoas-targeted SCS technique in managing MCLBP. This research provides new insight into the biomechanical effects of iliopsoas tender points and their clinical value in manual therapy approaches.

**Trial registration:** ClinicalTrials.gov has registered this trial under the identifier NCT06748859: https://clinicaltrials.gov/ct2/show/NCT06748859.

**3. KEYWORDS**

Mechanical chronic low back pain—strain-counterstrain—iliopsoas—manual therapy.

**4. MAIN TEXT**

**Background**

Low back pain (LBP) is a symptom rather than a diagnosis. It is a common clinical finding that may result from various underlying conditions (1, 2). Approximately one-third of patients with acute LBP progress to chronic low back pain (CLBP), which can severely impact physical, psychological, and social functioning, ultimately diminishing QOL (3, 4).

There are several classifications of low back pain. Generally, these methods can be grouped into three main categories: mechanical, nonmechanical, and psychological. Mechanical low back pain, which accounts for approximately 97% of cases, can be further divided into specific and nonspecific types. (5, 6). Mechanical chronic low back pain (MCLBP) originates from various sources including spinal dysfunctions, intervertebral disc problems, and surrounding soft tissues due to overstress, injury or other causes (2). Poor posture, inadequate ergonomics, or repetitive overuse can influence the mechanical behavior of soft tissues and joint structures and often aggravate these conditions. Pain from mechanical sources typically worsens with movement, commonly in a specific direction, and improves with rest, highlighting the importance of ergonomic issues in prevention and treatment plans (7, 8).

Soft tissues play crucial roles in the spinal stabilization and maintaining proper postural alignment. Muscle structure and function are interdependenti and both are affected by pain or injury, especially in cases of CLBP. Injuries or repetitive strains on these tissues can lead to dysfunction, manifested as myofascial trigger points, muscle atrophy, and fat infiltration. These structural alterations impair the capacity of the spine to absorb external loads, resulting in increased spinal stress and the exacerbation of CLBP. Moreover, damage to mechanoreceptors within soft tissues can disrupt proprioception, leading to abnormal muscle activation patterns and perpetuating the pain cycle (9, 10).

The iliopsoas muscle plays a critical role in both hip joint and lumbar spine stabilization. Anatomically, the psoas muscle connects the diaphragm, spine, and pelvic floor, forming part of the "lumbar cylinder," which plays a key role in stabilizing the body's core. At the L4–L5 level, the psoas major muscle is instrumental in resisting spinal instability, especially when there is multifidus fatty infiltration, compensating for the loss of posterior support. The myofascial tension of the iliopsoas is closely linked to low back pain (11). Tightness, shortening, and abnormal stiffness at this muscle lead to conditions such as lumbar hyperlordosis, changes in the pelvic tilt, and excessive horizontal and vertical stress on the vertebral column. This tension can exacerbate pressure on the spinal muscles, particularly the erector spinae, and increase the risk of disc herniation (12, 13). Prolonged sitting, a common modern lifestyle behavior, further elevates the risk of iliopsoas tightness and subsequent low back pain (14). Therefore, maintaining the flexibility of the iliopsoas is essential not only for preventing lumbar stiffness and degeneration but also for preserving the intricate balance of spinal stability, particularly at the critical L4–L5 level.

Abnormal responses of muscle spindles, golgi tendon organs (GTOs), and inflammatory processes to changes in muscle length and tension result in muscle strain. Muscle spindles are responsible for sensing muscle length changes and sending signals to the central nervous system. When muscle spindle activity is disrupted by excessive stretching or contracting, it can lead to changes in muscle tone and hypertonic myofascial tissue. Injury to muscle also causes fibroblasts to release inflammatory cytokines such as IL-1α, IL-1β, IL-6, and IL-16, which activate the immune system, increase blood flow, and cause swelling and pain. These inflammatory substances, along with the activation of pain receptors, lead to the release of neuropeptides such as substance P and calcitonin gene-related peptide (CGRP), which widen blood vessels and increase pain sensitivity(15). The development of tender points is often linked to these inflammatory and neurophysiological changes, resulting in localized muscle tension and pain that can be felt in other areas. Tender points indicate active muscle strain where abnormal signals from muscle spindles cause ongoing muscle guarding and pain in the lumbopelvic region(16). Any change in the length and stiffness of the iliacopsoas muscle can be a source of lumbar spine range of motion (ROM) and mobility alternation (17).

The SCS technique, also known as the counterstrain technique, is a widely utilized indirect manipulative technique designed to address musculoskeletal pain, somatic dysfunction, and impaired lumbar range of motion. The SCS was first introduced by Lawrence Jones in 1955. It operates on the principle of alleviating pain and muscle tension by positioning the patient in a position of comfort (at least 70% less tender) and targeting specific areas of dysfunction known as tender points. By guiding the affected tissues into the position of comfort and maintaining it for approximately 90 seconds, the SCS facilitates the relaxation of guarded muscles, proprioceptive signal normalization, and restoration of tissue balance. While clinical evidence regarding the physiological mechanisms of the SCS remains limited, studies suggest its efficacy in modulating gamma motor neuron activity, reducing nociceptive signaling, and enhancing local circulation (15, 18).

The SCS technique is widely used in manual therapy because of its gentle approach to the treatment of acute and chronic pain and because patients who have not achieved a treatment response with conventional methods. Nevertheless, SCS should not be applied in cases of inflammation at the tender point, pain due to infection, or patients who cannot report to the therapist or cannot tolerate manual therapy. Thus, it is important to select the right patient, i.e.. Those with a mechanical source (15, 19). An analysis of the available literature indicates that SCS is an effective method for the management of different musculoskeletal disorders including hip tender points, trapezius pain, neck pain, ankle instability, plantar fasciitis, shoulder pain, sacral torsion, and lower back pain, among others. Although the application of SCS in conditions such as piriformis syndrome, iliacus, and psoas dysfunction has not been well researched, these techniques are significant in manual therapy training and practice (15). We hypothesize that applying the SCS technique to the iliopsoas muscle effectively affects the level of pain, lumbar ROM and mobility and thus an individual’s disability and QOL in patients with MCLBP.

This study aimed to compare the effects of conventional lumbar exercise therapy alone and in combination with the SCS technique for alleviating pain and improving lumbar ROM, mobility, disability, and health-related QOL in patients with MCLBP.

**Method:**

**Study aims:**

The primary aim of this randomized controlled trial (RCT) was to investigate the effectiveness of combining exercise therapy with the iliopsoas SCS technique in comparison to exercise therapy alone for pain in individuals with MCLBP characterized by iliopsoas muscle tender points. The secondary aim of this study was to evaluate the effects of this technique on the lumbar range of motion, lumbar mobility, iliopsoas muscle shortening, level of functional disability, and HRQOL.

It is hypothesized that while both treatment protocols are expected to be effective, the combined intervention of exercise therapy and the iliopsoas SCS technique will result in clinically and statistically significant improvements across all primary and secondary outcomes. Additionally, potential adverse effects, such as transient discomfort during SCS or posttreatment soreness, will be monitored and documented.

**Study design, randomization, and allocation:**

The present protocol is a prospective, unmasked randomized controlled trial (i.e., participants and outcome assessors will not be blinded to group allocation) randomized controlled trial with two parallel groups: one receiving exercise therapy alone and the other receiving exercise therapy combined with the iliopsoas SCS technique and a 1:1 allocation ratio. The ethics committee of Marmara University, Faculty of Health Sciences approved the protocol (Ethics Committee Approval No: 2024/157), and it is registered at Clinical Trials.gov (ID: NCT06748859). This study protocol follows the SPIRIT (Standard Protocol Items: Recommendations for Interventional Trials) checklist (20), which is available as an additional file 2.

The participants will be randomly assigned to either the control group (exercise therapy alone) or the experimental group (exercise therapy + iliopsoas SCS technique) via the block-balanced randomization method (block size: 4). A computerized random allocation sequence with 4 block sizes will be generated vai the [www.sealedenvelope.com](http://www.sealedenvelope.com) website. Sealed envelopes will be provided and opened by an uninvolved party (who will not be assessor or therapist) after participant allocation and at the time of participant randomization.

**Study settings and participants:**

The study will be conducted at the Physical Therapy Clinic of Biruni University Hospital. A total of 32 volunteers aged 18–60 years with chronic mechanical low back pain and tender points in the iliopsoas muscle will be included in the study. Participants will be recruited via announcements posted within the physiotherapy outpatient clinic of Biruni University Hospital and through referrals by physical medicine and rehabilitation physicians. Flyers and digital announcements will also be used to reach eligible individuals. Recruitment will continue until the required sample size is reached. The participants will be individually evaluated by the research coordinator at the clinic to determine their eligibility for the study. Eligibility will be determined by the research coordinator. Participants who meet the criteria and provide informed consent to participate will receive a detailed verbal explanation regarding the study objectives, assessment procedures, and planned interventions. Written informed consent will be obtained from all participants before their enrollment in the study. During the trial period, participants will be allowed to continue their usual medications and routine care, as long as they do not interfere with the intervention protocol. No concomitant manual therapy or structured exercise programs apart from the study protocol will be permitted.

**Inclusion and exclusion criteria:**

Participants were required to meet all of the following criteria to be eligible for the study: aged between 18 and 60 years with a diagnosis of chronic mechanical low back pain (CMLBP) lasting more than 12 weeks on the basis of a diagnosis of physical medicine and a rehabilitation specialist, reporting a pain intensity of ≥ 3 on the Numeric Pain Rating Scale, experiencing pain during lumbar flexion movement, testing positive for the Thomas test, having tenderness on the iliopsoas muscle at least four times greater than on the ipsilateral quadratus lumborum muscle (18), being able to communicate effectively with the research team, and providing consent to participate in the study. Participants will not be included if they are pregnant, are indicated for lumbar surgery by a physical medicine and rehabilitation specialist, or have a fracture or history of trauma that contraindicates manual therapy.

**Discontinuation criteria:**

The participants will have the right to withdraw from the trial at any time without providing a reason. Additionally, intervention or comparator procedures may be discontinued in cases of adverse events, worsening of symptoms, or significant patient discomfort reported during the sessions. No preplanned modifications to the intervention are anticipated.

**Intervention:**

The participants will be randomly assigned to either the exercise therapy (control) group or the exercise therapy combined with the iliopsoas strain-counterstrain (SCS) technique (experimental) group. The interventions for both groups will be conducted over a period of 2 weeks, with three sessions per week, for a total of 6 sessions. Each session will last between 20 and 40 minutes. The participants will be encouraged to practice these exercises at home once per day. A licensed physiotherapist physical therapist will be responsible for administering the interventions throughout the trial. To ensure adherence to the intervention protocols, all physiotherapy sessions will be supervised by an experienced physiotherapist and will be conducted in a clinical setting. Participants will be reminded of their scheduled sessions via telephone reminders or text messages. Additionally, the importance of full participation will be emphasized verbally at the beginning of the study to encourage compliance.

All participants will engage in a series of exercises aimed at alleviating low back pain, including the following:

***1) Cat-Camel Exercise:***

The cat-camel exercise, performed for 3 sets of 5 repetitions, aims to improve flexibility in the lumbar and thoracic regions (21). This exercise consists of two steps. Initially, the patient assumes a quadruped position. In the first step, the patient is instructed to look at their navel, engage the abdominal muscles, increase thoracic kyphosis, and move the navel upward. This position is held for 10 seconds. In the second step, the patient extends the head, performs a posterior pelvic tilt, and increases lumbar lordosis, holding this position for 10 seconds. The patient is instructed to move between these two positions slowly and in a coordinated manner. Each repetition consists of completing both steps.

***2)******Hip Abduction:***

Patients experiencing challenges with hip movement and lumbar spine stability have shown reductions in lower back pain and disability scores when hip joint exercises along with lumbar stabilization exercises are incorporated (22). For this exercise, which is performed for 3 sets of 10–12 repetitions, the patient lies on their side with the bottom leg flexed at the hip and knee to 90 degrees. The top leg is abducted, lowered toward the bottom leg, and subsequently abducted again.

***3) Bridging Exercise:***

Bridging exercise is commonly employed to alleviate lower back pain by stabilizing the area between the back and pelvis (23). For 3 sets of 5 repetitions, the participants lay supine with their knees bent to 90° and their arms positioned alongside the torso. Without lifting the arms, the hips and lower back are raised until the spine and hips are aligned, forming a straight line. This position is held for 5 seconds before returning to the starting position (24).

***4) Dead Bug Exercise:***

The dead bug exercise, performed for 3 sets of 10–12 repetitions, is designed to increase the strength and endurance of the core muscles. By contributing to pelvic balance and stabilization, it supports improved performance in daily activities and physical tasks (25) . In this study, the focus on the iliopsoas muscle ensures eccentric strengthening of this muscle. The patient begins in a supine position with the shoulders, hips, and knees flexed to 90°. In a controlled manner, one arm is extended overhead while the opposite leg is extended at the hip and knee. The movement is then repeated with the contralateral arm and leg. Throughout exercise, the limbs should not touch the ground.

These exercises are the same in both the intervention and control groups, and participants perform them in the clinic under physiotherapist supervision during each session.

**Exercise therapy combined with the iliopsoas SCS technique**

Immediately after receiving the iliopsoas SCS technique performed by a certified physiotherapist in the field of manual therapy, participants in the intervention group will perform exercises.

The participants first lay supine, with their arms at their sides and legs parallel to each other. The therapist begins by performing deep palpation 2 inches medial and slightly inferior to the anterior superior iliac spine (ASIS) to locate the tender points in the iliopsoas muscle. Once a tender point is identified, the therapist will guide the patient to reduce the palpation sensitivity around the tender point by positioning the shortened tissues. Specifically, the therapist places one foot on the bed and the patient's foot over their own thigh, gently moving the patient’s hip into flexion, abduction, and external rotation. The therapist then locks the position by placing the opposite foot on the side being treated (26).

The most critical part of the treatment is finding the position of comfort, which is associated with a 70% reduction in pain. Once the correct position is identified, maintaining pressure may no longer be necessary, although light touches may be applied to ensure proper palpation. The patient is held in the comfort position for 90 seconds, after which they are passively returned to the neutral position, and the pressure is completely released. This treatment should be applied three times to the side with the tender point and twice to the contralateral side, with 30-second intervals between each application (18, 27).

**Adverse Events and Harms:**

All participants will be informed and encouraged to report any unusual symptoms or discomfort during or after the intervention sessions. The physiotherapist will monitor for adverse events (e.g., muscle soreness, increased pain, dizziness) during each session and record any adverse events or reactions. Adverse events will be nonstructured monitoring through patient self-reports and therapist observation. Any serious adverse events will be reported to the study supervisor and the ethics committee. No known serious adverse effects are expected given the minimal-risk nature of the intervention.

**Outcome measures:**

Outcome measurements will be assessed in 3 phases: pretest (prior to intervention), posttest (immediately after intervention), and after 2 weeks (i.e., following 6 sessions). The requirement for this study to be conducted as part of a master’s thesis and for patient recruitment to be carried out by a single physiotherapist precluded the implementation of a blinded study design.

The timelines of participant recruitment, randomization, intervention, and outcome assessments are detailed in Table 1 (20). All participants will be enrolled and randomized on Day 1. The intervention began on Day 1. Acute changes in pain intensity and lumbar ROM will be assessed 30 minutes after the first session (Day 1). On Day 2, participants completed functional disability (ODI) and quality of life (SF-36) assessments. Final outcome assessments will be conducted at the end of the second treatment week (day 14).

***Primary outcomes:***

The primary outcome measures included the visual analog scale (VAS) score for pain at rest and during lumbar flexion.

- Visual Analog Scale (VAS):

The VAS is commonly employed to assess pain intensity. Patients are instructed to indicate their level of pain on a 100 mm line, with one end representing a score of 0, meaning "no pain," and the opposite end representing a score of 10, indicating the "worst imaginable pain." The patient's pain score is determined by measuring the distance from the left end of the scale to the point marked by the patient, and this measurement is recorded via a ruler (28).

| **Table 1. Participant timeline: Schedule of enrollment, interventions, and assessments.** | | | | | | | | | |
| --- | --- | --- | --- | --- | --- | --- | --- | --- | --- |
|  | | **TRIAL PERIOD** | | | | | | | |
|  | | **Enrollment** | | **Post-randomization** | | | | | **Close-out** |
| **TIMEPOINTb** | | ***-ti* to 0** | **0** | ***t1*** | ***t2*** | ***t3*** | ***t4*** | ***etc.*** | ***t7*** |
| **ENROLLMENT** | **Eligibility screen** | X |  |  |  |  |  |  |  |
| **Informed consent** | X |  |  |  |  |  |  |  |
| **Randomization** |  | X |  |  |  |  |  |  |
| **INTERVENTION** | **Intervention** |  |  | X |  | X | X | etc. | X |
| **Exercises at home (once per day)** |  |  | X | X | X | X | etc. |  |
| **ASSESSMENTS** | **VAS, ROM, MMST, TT** |  | X | X |  |  |  |  | X |
| **ODI, SF-36** |  | X |  | X |  |  |  | X |
| t: time; VAS:Visual analog scale; ROM: Range of Motion; MMST: Modified-Modified Schober Test; TT: Thomas Test; ODI: Oswestry Disability Index; SF-36: Short Form-36. | | | | | | | | | |

***Secondary outcomes:***

The secondary outcomes include the TiltMeter© application for assessing the lumbar spine range of motion, the Modified Schober test (MST) for evaluating spinal mobility, the Thomas test for measuring iliopsoas muscle shortening, the Oswestry Disability Index (ODI) for assessing functional disability, and the Short Form-36 (SF-36) for evaluating quality of life.

*- Lumbar flexion and extension range of motion:*

The TiltMeter©-advanced level and inclinometer app (version 4.0.1; downloaded from Apple’s App Store) will be used to measure lumbar flexion and the extension range of motion. This method is a reliable, efficient, and precise tool for assessing isolated lumbar movements, showing substantial concordance with a gravity-based inclinometer (29).

The participants were instructed to position their feet shoulder-width apart and relax their arms at their sides during the measurement procedure. The first measurement is taken by placing an iPhone© model 14 pro (iPhone® is a trademark of Apple, Inc., Cupertino, California, USA) device at the T12–L1 level, followed by repositioning it to the S1–S2 level. The participants were asked to perform maximal lumbar flexion and extension with their legs straight. The total range of motion (ROM) for lumbar flexion and extension is determined by calculating the difference between the measurements at the T12–L1 and S1–S2 levels. To ensure precision, each measurement was repeated three times, and the average value was recorded (30).

*Modified modified Schober test (MMST):*

A commonly used method for assessing spinal mobility is preferred because of its simplicity and strong correlation with flexion measurements obtained through radiographs. This method provides precise results, is easy to apply, and requires low-cost materials. Additionally, MMST poses no risk of harm to the patient. The patient will be asked to stand with their feet shoulder-width apart. A marker was then placed between the two posterior superior iliac spines, and 15 cm was added to this distance. The patient will then be asked to bend forward without bending their knees, and the two distances will be measured. 15 cm will be subtracted, and the result will be recorded (31).

*Thomas Test:*

This test is used to assess iliopsoas muscle length. During the test, the patient lay supine, with one leg kept straight while the other leg was flexed at the hip and knee. The patient should keep the straight leg parallel to the bed and then pull the flexed leg toward their side. It is important to ensure that the spine remains flat and that the hip is in full rotation during this process. If the tested leg remained parallel to the bed, no shortening was recorded. However, if the leg is raised away from the bed, the angle will be measured via a goniometer and noted (32).

*Oswestry Disability Index (ODI)*

The ODI is a straightforward and reliable tool for measuring functional limitations caused by low back pain. Its Turkish validity and reliability were established by Yakut et al. in 2004 (33). Originally introduced in 1980, the questionnaire comprises 25 items addressing various functional aspects through 10 categories: pain intensity, personal care, lifting, walking, sitting, standing, sleeping, sexual life, social life, and traveling. Each item is scored between 0 and 5, with 0 indicating minimal limitation and 5 representing maximum limitation. The total score is calculated via the following formula: Total Score = (Total Points/Number of Items Answered×5) ×100

This method allows for an accurate assessment of the degree of disability (33, 34).

*Short Form-36 (SF-36):*

The SF-36, developed in 1992 by John E. Ware and Cathy Donald Sherbourne, is a widely used tool for assessing health-related quality of life (35). The scale evaluates quality of life across eight distinct domains: physical functioning; role limitations due to physical health; role limitations due to emotional problems; vitality; mental health; social functioning; bodily pain; and general health perception. Each domain is scored on a scale ranging from 0 to 100, with higher scores indicating better health status. The SF-36 has been adapted for various populations, including the Turkish population, and has demonstrated strong reliability and validity (36).

A single trained physiotherapist collected data through standardized procedures to minimize the impact of assessor variability. The reliability and validity of all the selected assessment tools are supported by previous research. Lumbar range of motion was measured via an inclinometer (TiltMeter©), and each measurement was performed three times, with the mean value recorded to increase precision. Standardized data collection protocols were followed strictly. All trial data will be entered electronically into a secure, password-protected database by trained personnel. Unique codes will be used to ensure participant confidentiality. Data quality will be maintained through double data entry, logical range checks, and routine data verification. All the electronic files are stored on encrypted servers with regular backups. The data collection forms and full assessment dataset are provided in Additional file 6.

**Statistical methods:**

All the statistical analyses will be conducted via Stata (version 13; StataCorp, College Station, TX, USA). For continuous variables, the results are presented as the means ± standard deviations (SDs), and for categorical variables, the results are presented as frequencies (%).

Normality will be assessed through P–P plots, Q–Q plots, and the Shapiro–Wilk test. If all groups exhibit nonnormal distributions at the three time points, we apply a data-transformation strategy via the “gladder” and “ladder” commands in Stata.

To evaluate within- and between-group changes over time, we will conduct repeated-measures ANOVA. We will also employ repeated-measures ANCOVA (37) when adjusting for the baseline scores of each outcome as a covariate. In the event that baseline VAS differences between groups exceed 20% of the standard deviation (38), we will include the VAS score as a second covariate in the analysis of other outcomes (i.e., one factor with two covariates). Scheffé’s post hoc test will be used to identify pairwise differences from the repeated-measures ANOVA.

We report point estimates of the effect as the mean differences (MDs) with 95% confidence intervals and provide standardized mean differences (SMDs; Cohen’s d). We interpret SMD values of 0.2–0.49 as small, 0.5–0.79 as moderate, 0.8–1.19 as large, and ≥1.2 as very large. Partial eta-square values will also be presented for each repeated-measures ANOVA and ANCOVA.

If data transformation is not feasible (e.g., if any group/time point remains nonnormal), nonparametric analyses will be used. Specifically, Friedman’s test will assess within-group changes, and the Kruskal–Walli’s test will be used for between-group comparisons. We considered an alpha level of ≤0.05 as statistically significant. Participants who discontinued the intervention were encouraged to complete follow-up assessments whenever possible. However, missing data due to dropout are handled via an intention-to-treat (ITT) approach via multiple random imputations. No interim analyses or predefined stopping guidelines will be planned, as the intervention period is short and the expected risk associated with the manual therapy technique is minimal. The principal investigator will oversee the trial conduct and ensure participant safety throughout the study.

**Sample size:**

In order to determine the sample size, we used the G*Power V.3.1 software (Franz Faul, Christian-Albrechts-Universitätzu Kiel, Kiel, Germany) calculating the sample size through repeated measurement of ANOVA (between factor) statistical test. We first calculated the f effect size using an online calculator (39) that considers 3 cm as the minimal clinically important difference (MCID) for the VAS (40) and 2.33 as the standard deviation (SD) for this outcome (36). Considering an alpha of 0.01, a beta of 0.95, and a correlation coefficient among repeated measurements of 0.25, 13 patients in each group were included in the calculation of the sample size. To avoid sample size problems such as possible drop outs, we will enrol 18 participants in each group.

**Discussion:**

Over the past three decades, LBP has been characterized as the leading cause of disability in musculoskeletal diseases and has increased by more than 100% in low sociodemographic index (SDI) countries. While there will be a decrease in high-SDI countries, their large population of elderly individuals and fragile health systems make LBP still a major concern at the worldwide level. LBP, if not managed properly, can lead to other complications, such as depression, sleep disorders, loss of function, an extended recovery period, and, in severe cases, cognitive impairment. It is also responsible for many cases of early exit from the workforce and is also known to contribute to absenteeism and reduced productivity, thereby increasing societal impact. Since LBP is a recurrent and severe condition, it must be considered a serious condition that requires early diagnosis and a well-defined management plan (41, 42).

Tension of the iliopsoas muscle is one of the major causes of lumbar hyperlordosis, and it is believed that it is among the leading causes of low back pain. Iliopsoas muscle spasms have been noted to be present in subjects with low back pain, which can affect the natural position of the pelvis. The treatment of iliopsoas muscle tightness during physiotherapy sessions can enhance pelvic alignment and reduce lower back pain to a great extent. Thus, the improvement of this muscle decreases the risk of muscle tightness and supports pelvic neutral position retroversion and thus has positive effects on spinal mechanics and general functioning (12, 43).

The strain‒counter (SCS) technique involves these tender points, which are the specific areas of spasm, which are the hardening of the muscles as a result of constant strain and the lack of proper proprioceptive information to the brain, which results in ischemia, metabolic disturbances, and enhanced nociceptor function when applied for positional release. SCS relaxes the muscle by reducing the activity of gamma motor neurons, rebalances proprioception, and breaks the pain‒spasm cycle. This realignment thus alleviates the tension and nociceptive input of the tissue and thus enhances the blood supply, oxygenation, and metabolic processes in the region. Although the application of SCS in conditions such as piriformis syndrome, iliacus, and psoas dysfunction has not been well researched, these techniques are important for osteopathic training and therapy (15, 18).

The main aim of this study was to investigate the impact of strain-counterstrain (SCS) on chronic mechanical low back pain (CMLBP). More specifically, the following research objective was set: to determine whether SCS can help with tender points in the iliopsoas muscle, thus reducing low back pain and enhancing the range of motion of the lumbar spine. To this end, the study will be conducted with strict controls and high-quality standards to provide strong evidence supporting the addition of SCS to the management of CMLBP alongside other interventions, such as exercise therapy. The information gathered from this study will be useful to clinicians in the management of patients with CMLBP to make informed decisions and to help researchers understand more about the mechanisms behind tender points in the iliopsoas muscle and their biomechanical implications. This knowledge could ultimately contribute to the development of more effective treatment strategies in clinical practice.

**Trial status:**

Date recruitment began: 30.12.2024

Approximate date when recruitment will be completed: 30.03.2025

**5. LIST OF ABBREVIATIONS**

CGRP – Calcitonin gene-related peptide

CLBP – Chronic low back pain

GTOs – Golgi tendon organs

ITT – Intention-to-treat

LBP – low back pain

MCLBP – Mechanical chronic low back pain

MD – Mean difference

MMST – Modified-modified Schober test

ODI – Oswestry Disability Index

QOL – Quality of life

RCT – Randomized controlled trial

SCS – Strain-Counterstrain

SD – Standard deviation

SDI – Sociodemographic index

SF-36 – Short Form-36

TPs – Tender points

VAS – visual analog scale

**6. DECLARATIONS**

**Ethics approval and consent to participate:** The ethics committee of Marmara University, Faculty of Health Sciences (Ethics Committee Approval No: 2024/157). Written informed consent to participate will be obtained from all participants. Additionally, any future protocol amendments will be submitted to the Ethics Committee for approval and updated at ClinicalTrials.gov. If needed, participants and other relevant parties will be informed.

**Availability of data and materials:** The datasets collected during the current study will be available from the corresponding author upon reasonable request. The requests should be accompanied by a brief research proposal, including the objectives and methodology. Data access may be subject to approval by an appropriate ethics committee to ensure compliance with privacy regulations and confidentiality standards. Anonymized data, rather than personally identifiable information, will be shared in accordance with these guidelines. The full trial protocol and the detailed statistical analysis plan are available in Additional file 7 and Additional file 3, respectively, and will also be uploaded to the ClinicalTrials.gov record (NCT06748859) prior to publication.

**Competing interests:** The authors declare that they have no conflicts of interest related to the current study.

**Funding:** This study is part of a master’s thesis project at Marmara University. No specific funding was allocated.

**Authors' contributions:** JHB conceived and designed the study protocol and coordinated the preparation of this document. MJ contributed to the methodological design, especially the statistical approach. ÇÇ and GÇA supported the clinical planning of patient recruitment, eligibility assessment, and randomization procedures. OA critically reviewed the protocol for clarity and methodological accuracy. ZS supervised the protocol development process and provided expert guidance throughout. All the authors reviewed and approved the final version of this protocol.

**Confidentiality:** All personal information collected from participants will be deidentified and stored in password-protected digital files. Only authorized study personnel will have access to these data. The participants will be assigned identification codes instead of names, and no personally identifiable information will be included in any publications or reports. Data confidentiality will be maintained throughout the trial, and all physical documents (e.g., consent forms) will be securely stored in locked cabinets at the research site. After the trial concludes, data will be archived securely for a minimum of 5 years, as per institutional policies.

**Consent for publication:** No individually identifiable information (e.g., images, personal details) is presented in this manuscript. Therefore, specific consent for publication is not needed. All participants provided written informed consent for the use of their anonymized data in scientific publications.

**Ancillary and posttrial care:** No specific ancillary or posttrial care is planned. Participants who experience any discomfort or harm during the intervention will be referred to appropriate healthcare services within the institution. The intervention is noninvasive and considered low risk, so no financial compensation is anticipated or planned. The university hospital’s general policy will apply in case of any adverse events.

**Trial Organization:** No separate coordinating center, steering committee, endpoint adjudication committee, or data management team was formed because of the single-center and small-scale nature of the investigator-initiated master’s thesis study. All trial activities were coordinated and supervised by the principal investigator.

**Dissemination Policy:** The results of this study will be submitted for publication in a peer-reviewed open-access journal and shared through academic presentations. The study is registered on ClinicalTrials.gov, and its results will also be made available on that platform.

**Acknowledgments:** Not applicable

**References**

1. Lorio M, Lewandrowski K-U, Coric D, Phillips F, Shaffrey CI. International society for the advancement of spine surgery statement: restorative neurostimulation for chronic mechanical low back pain resulting from neuromuscular instability. International Journal of Spine Surgery. 2023;17(5):728-50.

2. Paikera M, Barve L, Dubey S. Mechanical Low Backache. J Trend Sci Res Dev. 2018;2:1612-23.

3. Hoy D, Bain C, Williams G, March L, Brooks P, Blyth F, et al. A systematic review of the global prevalence of low back pain. Arthritis & Rheumatism. 2012;64(6):2028-37.

4. Stevans JM, Delitto A, Khoja SS, Patterson CG, Smith CN, Schneider MJ, et al. Risk Factors Associated With Transition From Acute to Chronic Low Back Pain in US Patients Seeking Primary Care. JAMA Network Open. 2021;4(2):e2037371-e.

5. O’Sullivan P. Diagnosis and classification of chronic low back pain disorders: maladaptive movement and motor control impairments as underlying mechanism. Manual therapy. 2005;10(4):242-55.

6. Gianola S, Castellini G, Andreano A, Corbetta D, Frigerio P, Pecoraro V, et al. Effectiveness of treatments for acute and sub-acute mechanical non-specific low back pain: protocol for a systematic review and network meta-analysis. Systematic Reviews. 2019;8(1).

7. Will JS, Bury DC, Miller JA. Mechanical low back pain. American family physician. 2018;98(7):421-8.

8. Cohen SP, Argoff CE, Carragee EJ. Management of low back pain. Bmj. 2008;337.

9. Mosabbir A. Mechanisms behind the Development of Chronic Low Back Pain and Its Neurodegenerative Features. Life. 2022;13(1):84.

10. Hodges PW, Danneels L. Changes in Structure and Function of the Back Muscles in Low Back Pain: Different Time Points, Observations, and Mechanisms. Journal of Orthopaedic &amp; Sports Physical Therapy. 2019;49(6):464-76.

11. Özcan-Ekşi EE, Ekşi MŞ, Turgut VU, Canbolat Ç, Pamir MN. Reciprocal relationship between multifidus and psoas at L4-L5 level in women with low back pain. British Journal of Neurosurgery. 2021;35(2):220-8.

12. Aali S, Letafatkar A, Ebrahimi E, Barati AH, Hadadnejad M. Effect of Iliopsoas muscle tightness with active motion on extensor-flexor muscle strength of femor and thoracolumbar curves in adolescent soccer player. Journal of Gorgan University of Medical Sciences. 2017;19(4):54-60.

13. Jorgensson A. The iliopsoas muscle and the lumbar spine. Australian Journal of Physiotherapy. 1993;39(2):125-32.

14. Pradip B, Sudhir B, Nidhi B. Prevalence of tightness in hip muscles in middle aged Indian men engaging in prolonged desk jobs: A descriptive study. International journal of physical education, sports and health. 2018;5:15-21.

15. Fritz K, Krupa KN, Sina RE, Carr Jr CL. Physiology, counterstrain and facilitated positional release (FPR). StatPearls [Internet]: StatPearls Publishing; 2023.

16. Lewis C, Souvlis T, Sterling M. Sensory characteristics of tender points in the lower back. Man Ther. 2010;15(5):451-6.

17. Avers D, Brown M. Daniels and Worthingham's Muscle Testing, First South Asia Edition E Book: Techniques of Manual Examination and Performance Testing: Elsevier; 2018.

18. Jones LH, Kusunose RS, Goering EK. Jones Strain-Counterstrain: Jones Strain Counterstrain Incorporated; 1995.

19. Johnson SM, Kurtz ME. Osteopathic manipulative treatment techniques preferred by contemporary osteopathic physicians. J Am Osteopath Assoc. 2003;103(5):219-24.

20. Chan A-W, Boutron I, Hopewell S, Moher D, Schulz KF, Collins GS, et al. SPIRIT 2025 statement: updated guideline for protocols of randomised trials. BMJ. 2025;389:e081477.

21. Ramakrishnan V, Bhattacharya T. E ectiveness of pelvic clock, Cat & Camel Exercises on Gait Performance in a 64 year old Female Patient with Sub-acute LT Sided Hemiplegia (Post Resection of Motor Cortex Glioma)-A Case Study.

22. Lee SW, Kim SY. Effects of hip exercises for chronic low-back pain patients with lumbar instability. Journal of Physical Therapy Science. 2015;27(2):345-8.

23. Kang H, Jung J, Yu J. Comparison of trunk muscle activity during bridging exercises using a sling in patients with low back pain. J Sports Sci Med. 2012;11(3):510-5.

24. Saliba SA, Croy T, Guthrie R, Grooms D, Weltman A, Grindstaff TL. Differences in transverse abdominis activation with stable and unstable bridging exercises in individuals with low back pain. N Am J Sports Phys Ther. 2010;5(2):63-73.

25. Mullane M, Turner A, Bishop C. Exercise technique: The dead bug. Strength & Conditioning Journal. 2019;41(5):114-20.

26. Collins CK, Masaracchio M, Cleland JA. The effectiveness of strain counterstrain in the treatment of patients with chronic ankle instability: A randomized clinical trial. Journal of Manual &amp; Manipulative Therapy. 2014;22(3):119-28.

27. Dardzinski JA, Ostrov BE, Hamann LS. Successful Use of a Strain and Counterstrain Technique with Physical Therapy: Myofascial Pain Unresponsive to Standard Treatment. JCR: Journal of Clinical Rheumatology. 2000;6(4):169-74.

28. Boonstra AM, Preuper HRS, Reneman MF, Posthumus JB, Stewart RE. Reliability and validity of the visual analogue scale for disability in patients with chronic musculoskeletal pain. International journal of rehabilitation research. 2008;31(2):165-9.

29. Pourahmadi MR, Taghipour M, Jannati E, Mohseni-Bandpei MA, Ebrahimi Takamjani I, Rajabzadeh F. Reliability and validity of an iPhone<sup>®</sup>application for the measurement of lumbar spine flexion and extension range of motion. PeerJ. 2016;4:e2355.

30. Pourahmadi M, Momeni E, Mohseni N, Hesarikia H, Ghanjal A, Shamsoddini A. The reliability and concurrent validity of a new iPhone® application for measuring active lumbar spine flexion and extension range of motion in patients with low back pain. Physiotherapy Theory and Practice. 2021;37(1):204-17.

31. Tousignant M, Poulin L, Marchand S, Viau A, Place C. The Modified–Modified Schober Test for range of motion assessment of lumbar flexion in patients with low back pain: A study of criterion validity, intra-and inter-rater reliability and minimum metrically detectable change. Disability and rehabilitation. 2005;27(10):553-9.

32. Improvement of Iliopsoas Flexibility: A Comparative Effectiveness between Post Isometric Relaxation and Static Stretching. Indian Journal of Physiotherapy and Occupational Therapy - An International Journal. 2020.

33. Yakut E, Düger T, Öksüz Ç, Yörükan S, Üreten K, Turan D, et al. Validation of the Turkish version of the Oswestry Disability Index for patients with low back pain. Spine. 2004;29(5):581-5.

34. Fairbank JCT, Pynsent PB. The Oswestry Disability Index. Spine. 2000;25(22):2940-53.

35. Ware JE, Jr., Sherbourne CD. The MOS 36-item short-form health survey (SF-36). I. Conceptual framework and item selection. Med Care. 1992;30(6):473-83.

36. Dayanır IO, Birinci T, Kaya Mutlu E, Akcetin MA, Akdemir AO. Comparison of Three Manual Therapy Techniques as Trigger Point Therapy for Chronic Nonspecific Low Back Pain: A Randomized Controlled Pilot Trial. J Altern Complement Med. 2020;26(4):291-9.

37. Imbens GW, Rubin DB. Causal Inference in Statistics, Social, and Biomedical Sciences: Cambridge University Press; 2015.

38. de Boer MR, Waterlander WE, Kuijper LD, Steenhuis IH, Twisk JW. Testing for baseline differences in randomized controlled trials: an unhealthy research behavior that is hard to eradicate. Int J Behav Nutr Phys Act. 2015;12:4.

39. psychometrica [Available from: <www.psychometrica.de>.

40. Lee JS, Hobden E, Stiell IG, Wells GA. Clinically Important Change in the Visual Analog Scale after Adequate Pain Control. Academic Emergency Medicine. 2003;10(10):1128-30.

41. Gu Y, Wang Z, Shi H, He Y, Yang Y, Li Y, et al. Global, Regional, and National Change Patterns in the Incidence of Low Back Pain From 1990 to 2019 and Its Predicted Level in the Next Decade. International Journal of Public Health. 2024;69:1606299.

42. Ferreira ML, De Luca K, Haile LM, Steinmetz JD, Culbreth GT, Cross M, et al. Global, regional, and national burden of low back pain, 1990–2020, its attributable risk factors, and projections to 2050: a systematic analysis of the Global Burden of Disease Study 2021. The Lancet Rheumatology. 2023;5(6):e316-e29.

43. Lakkadsha TM, Qureshi MDI, Kovela RK, Saifee SS, Lalwani SS. Efficacy of Single Stretching Session of Iliopsoas Using Proprioceptive Neuromuscular Facilitation Versus Muscle Energy Technique on Low Back Pain in Patients With Lumbar Hyper-Lordosis. Cureus. 2022.

**7. ADDITIONAL FILES**

File name: **Additional file 1**

File format: .docx

Title of data: SPIRIT 2025 Checklist

Description of data: This file contains the completed SPIRIT 2025 checklist (Standard Protocol Items: Recommendations for Interventional Trials), which outlines the essential protocol items for the design and reporting of the current randomized controlled trial. The checklist ensures methodological transparency and adherence to clinical trial reporting standards.
